# Supplementary material
Source: publisher figshare collection journal article supplement (https://tandf.figshare.com/articles/dataset/_/5327827)
Supplement: Supplementary file 1 [file 1]

## Item presentation order

**List 1:** prize, tide, choose, nose, booze, tracked, lynx, lacks, quartz, praise, bored, sighs, missed, crews, past, pleas, charred, flex, ode, rues, brews, laps, paws, guys, swayed, freeze, days, ducked, hose, raise, paced, seize, brood, pride, rapt, teas, pact, graze, claws, sacks

**List 2:** pries, tied, chews, knows, boos, tract, links, lax, quarts, prays, board, size, mist, cruise, passed, please, chard, flecks, owed, ruse, bruise, lapse, pause, guise, suede, frees, daze, duct, hoes, rays, paste, sees, brewed, pried, wrapped, tease, packed, grays, clause, sax

**List 3:** sacks, claws, graze, pact, teas, rapt, pride, brood, seize, paced, raise, hose, ducked, days, freeze, swayed, guys, paws, laps, brews, rues, ode, flex, charred, pleas, past, crews, missed, sighs, bored, praise, quartz, lacks, lynx, tracked, booze, nose, choose, tide, prize

**List 4:** sax, clause, grays, packed, tease, wrapped, pried, brewed, sees, paste, rays, hoes, duct, daze, frees, suede, guise, pause, lapse, bruise, ruse, owed, flecks, chard, please, passed, cruise, mist, size, board, prays, quarts, lax, links, tract, boos, knows, chews, tied, pries
